# Supplementary material for: CircRNA CBL.11 suppresses cell proliferation by sponging miR-6778-5p in colorectal cancer
Source: PubMed Central journal article supplement (PMC6704711; doi:10.1186/s12885-019-6017-2), 2019-08-22
Supplement: 12885_2019_6017_MOESM6_ESM.pdf [file 12885_2019_6017_MOESM6_ESM.pdf]

## Feature results (FEATURES)

The bottom section of the text file gives descriptions of the results for each feature. Results are reported to 9 decimal places in exponential notation for all result files.

### FULL Features Table

**Table 21** Feature results contained in the FULL output text file (FULL FEATURES table)\*

| Features (Green) | Features (Red) | Types   | Options | Description                                                            |
|------------------|----------------|---------|---------|------------------------------------------------------------------------|
| FeatureNum       |                | integer |         | Feature number                                                         |
| Row              |                | integer |         | Feature location: row                                                  |
| Col              |                | integer |         | Feature location: column                                               |
| Accessions       |                | text    |         | Gene accession numbers                                                 |
| Chr_coord        |                | text    |         | Chromosome coordinates of the feature                                  |
| SubTypeMask      |                | integer |         | Numeric code defining the subtype of any control feature               |
| SubTypeName      |                | integer |         | Name of the subtype of any control feature                             |
| Start            |                | integer |         | Indicates the place in the transcript where the probe sequence starts. |
| Sequence         |                | text    |         | The sequence of bases printed on the array.                            |
| ProbeUID         |                | integer |         | Unique integer for each unique probe in a design                       |

**Table 21** Feature results contained in the FULL output text file (FULL FEATURES table)\* (continued)

| Features (Green) | Features (Red) | Types   | Options | Description                                                                                                                                                                                                                                                                       |
|------------------|----------------|---------|---------|-----------------------------------------------------------------------------------------------------------------------------------------------------------------------------------------------------------------------------------------------------------------------------------|
| ControlType      |                | integer |         | Feature control type (See “XML Control Type output” on page 204 for definitions.)                                                                                                                                                                                                 |
|                  |                |         | 0       | Control type none                                                                                                                                                                                                                                                                 |
|                  |                |         | 1       | Positive control                                                                                                                                                                                                                                                                  |
|                  |                |         | -1      | Negative control                                                                                                                                                                                                                                                                  |
|                  |                |         | -20000  | Not probe (See Ch. 4 for definition)                                                                                                                                                                                                                                              |
|                  |                |         | -30000  | Ignore (See Ch. 4 for definition)                                                                                                                                                                                                                                                 |
| ProbeName        |                | text    |         | An Agilent-assigned identifier for the probe synthesized on the microarray                                                                                                                                                                                                        |
| GeneName         |                | text    |         | This is an identifier for the gene for which the probe provides expression information. The target sequence identified by the systematic name is normally a representative or consensus sequence for the gene.                                                                    |
| SystematicName   |                | text    |         | This is an identifier for the target sequence that the probe was designed to hybridize with. Where possible, a public database identifier is used (e.g., TAIR locus identifier for Arabidopsis). Systematic name is reported ONLY if Gene name and Systematic name are different. |
| Description      |                | text    |         | Description of gene                                                                                                                                                                                                                                                               |
| PositionX        |                | float   |         | Found coordinates of the feature centroid in microns                                                                                                                                                                                                                              |
| PositionY        |                |         |         |                                                                                                                                                                                                                                                                                   |

### 3 Text File Parameters and Results

#### FULL Features Table

**Table 21** Feature results contained in the FULL output text file (FULL FEATURES table)\* (continued)

| Features (Green)   | Features (Red) | Types | Options        | Description                                                                                 |
|--------------------|----------------|-------|----------------|---------------------------------------------------------------------------------------------|
| LogRatio (base 10) |                | float |                | per feature, log of<br>(rProcessedSignal/gProcessedSignal)                                  |
|                    |                |       |                | If SURROGATES are turned off, then:                                                         |
|                    |                |       | -4             | if DyeNormRedSig <= 0.0 &<br>DyeNormGreenSig > 0.0                                          |
|                    |                |       | 4              | if DyeNormRedSig > 0.0 &<br>DyeNormGreenSig <= 0.0                                          |
|                    |                |       | 0              | if DyeNormRedSig <= 0.0 &<br>DyeNormGreenSig <= 0.0                                         |
| LogRatioError      |                | float |                | If SURROGATES are turned off, then:                                                         |
|                    |                |       | 1000           | if DyeNormRedSig <= 0.0 OR<br>DyeNormGreenSig <= 0.0                                        |
|                    |                |       |                | IF SURROGATES are turned on, then:                                                          |
|                    |                |       |                | LogRatioError = error of the log ratio<br>calculated according to the error model<br>chosen |
| PValueLogRatio     |                | float |                | Significance level of the LogRatio<br>computed for a feature                                |
| gSurrogateUsed     | rSurrogateUsed | float | Non-zero value | The g(r) surrogate value used                                                               |
|                    |                |       | 0              | No surrogate value used                                                                     |

**Table 21** Feature results contained in the FULL output text file (FULL FEATURES table)\* (continued)

| Features (Green)   | Features (Red)     | Types   | Options                       | Description                                                                                                                                                                                                                                                                                                                                                                                                                                                                                     |
|--------------------|--------------------|---------|-------------------------------|-------------------------------------------------------------------------------------------------------------------------------------------------------------------------------------------------------------------------------------------------------------------------------------------------------------------------------------------------------------------------------------------------------------------------------------------------------------------------------------------------|
| gIsFound           | rIsFound           | boolean | 1 = IsFound<br>0 = IsNotFound | <p>A boolean used to flag found features. The flag is applied independently in each channel.</p> <p>A feature is considered Found if two conditions are true: 1) the difference between the feature signal and the local background signal is more than 1.5 times the local background noise and 2) the spot diameter is at least 0.30 times the nominal spot diameter.</p>                                                                                                                     |
| gProcessedSignal   | rProcessedSignal   | float   |                               | <p>The signal left after all the FE processing steps have been completed. In the case of one color, ProcessedSignal contains the Multiplicatively Detrended BackgroundSubtracted Signal if the detrending is selected and helps. If the detrending does not help, this column will contain the BackgroundSubtractedSignal.</p>                                                                                                                                                                  |
| gProcessedSigError | rProcessedSigError | float   |                               | <p>The universal or propagated error left after all the processing steps of Feature Extraction have been completed. In the case of one color, ProcessedSignalError has had the Error Model applied and will contain at least the larger of the universal (UEM) error or the propagated error.</p> <p>If multiplicative detrending is performed, ProcessedSignalError contains the error propagated from detrending. This is done by dividing the error by the normalized MultDetrendSignal.</p> |

### 3 Text File Parameters and Results

#### FULL Features Table

**Table 21** Feature results contained in the FULL output text file (FULL FEATURES table)\* (continued)

| Features (Green) | Features (Red) | Types   | Options | Description                                                                                                                                                                                                                        |
|------------------|----------------|---------|---------|------------------------------------------------------------------------------------------------------------------------------------------------------------------------------------------------------------------------------------|
| gNumPixOLHi      | rNumPixOLHi    | integer |         | Number of outlier pixels per feature with intensity > upper threshold set via the pixel outlier rejection method. The number is computed independently in each channel. These pixels are omitted from all subsequent calculations. |
| gNumPixOLLo      | rNumPixOLLo    | integer |         | Number of outlier pixels per feature with intensity < lower threshold set via the pixel outlier rejection method. The number is computed independently in each channel. These pixels are omitted from all subsequent calculations. |
|                  |                |         |         | NOTE: The pixel outlier method is the ONLY step that removes data in Feature Extraction.                                                                                                                                           |
| gNumPix          | rNumPix        | integer |         | Total number of pixels used to compute feature statistics; i.e. total number of inlier pixels/per spot; same in both channels                                                                                                      |
| gMeanSignal      | rMeanSignal    | float   |         | Raw mean signal of feature from inlier pixels in green and/or red channel                                                                                                                                                          |
| gMedianSignal    | rMedianSignal  | float   |         | Raw median signal of feature from inlier pixels in green and/or red channel                                                                                                                                                        |
| gPixSDev         | rPixSDev       | float   |         | Standard deviation of all inlier pixels per feature; this is computed independently in each channel.                                                                                                                               |
| gPixNormIQR      | rPixNormIQR    | float   |         | The normalized Inter-quartile range of all of the inlier pixels per feature. The range is computed independently in each channel.                                                                                                  |
| gBGNumPix        | rBGNumPix      | integer |         | Total number of pixels used to compute local BG statistics per spot; i.e. total number of BG inlier pixels; same in both channels                                                                                                  |

**Table 21** Feature results contained in the FULL output text file (FULL FEATURES table)\* (continued)

| Features (Green)      | Features (Red)        | Types   | Options                               | Description                                                                                                                                                                                                                                                                                                                                                         |
|-----------------------|-----------------------|---------|---------------------------------------|---------------------------------------------------------------------------------------------------------------------------------------------------------------------------------------------------------------------------------------------------------------------------------------------------------------------------------------------------------------------|
| gBGMeanSignal         | rBGMeanSignal         | float   |                                       | Mean local background signal (local to corresponding feature) computed per channel (inlier pixels)                                                                                                                                                                                                                                                                  |
| gBGMedianSignal       | rBGMedianSignal       | float   |                                       | Median local background signal (local to corresponding feature) computed per channel (inlier pixels)                                                                                                                                                                                                                                                                |
| gBGPixSDev            | rBGPixSDev            | float   |                                       | Standard deviation of all inlier pixels per local BG of each feature, computed independently in each channel                                                                                                                                                                                                                                                        |
| gBGPixNormIQR         | rBGPixNormIQR         | float   |                                       | The normalized Inter-quartile range of all of the inlier pixels per local BG of each feature. The range is computed independently in each channel.                                                                                                                                                                                                                  |
| gNumSatPix            | rNumSatPix            | integer |                                       | Total number of saturated pixels per feature, computed per channel                                                                                                                                                                                                                                                                                                  |
| gIsSaturated          | rIsSaturated          | boolean | 1 = Saturated or<br>0 = Not saturated | Boolean flag indicating if a feature is saturated or not. A feature is saturated IF 50% of the pixels in a feature are above the saturation threshold.                                                                                                                                                                                                              |
| gIsLowPMTScaled<br>Up | rIsLowPMTScaled<br>Up | boolean | 1 = Low<br>0 = High                   | Reports if the feature signal value is from the scaled-up low signal image or from the high signal image                                                                                                                                                                                                                                                            |
| PixCorrelation        |                       | float   |                                       | Ratio of estimated feature covariance in RedGreen space to product of feature standard deviation in Red Green space<br><br>The covariance of two features measures their tendency to vary together, i.e., to co-vary. In this case, it is a cumulative quantitation of the tendency of pixels belonging to a particular feature in Red and Green spaces to co-vary. |
| BGPixCorrelation      |                       | float   |                                       | The same concept as above but in case of background.                                                                                                                                                                                                                                                                                                                |

### 3 Text File Parameters and Results

#### FULL Features Table

**Table 21** Feature results contained in the FULL output text file (FULL FEATURES table)\* (continued)

| Features (Green) | Features (Red)   | Types   | Options                                                                              | Description                                                                                                                                                                                                                                                                                                                                                                         |
|------------------|------------------|---------|--------------------------------------------------------------------------------------|-------------------------------------------------------------------------------------------------------------------------------------------------------------------------------------------------------------------------------------------------------------------------------------------------------------------------------------------------------------------------------------|
| glsFeatNonUnifOL | rlsFeatNonUnifOL | boolean | g(r)IsFeatNonUnifOL = 1 indicates Feature is a non-uniformity outlier in g(r)        | Boolean flag indicating if a feature is a NonUniformity Outlier or not. A feature is non-uniform if the pixel noise of feature exceeds a threshold established for a "uniform" feature.                                                                                                                                                                                             |
| glsBGNonUnifOL   | rlsBGNonUnifOL   | boolean | g(r)IsBGNonUnifOL = 1 indicates Local background is a non-uniformity outlier in g(r) | The same concept as above but for background.                                                                                                                                                                                                                                                                                                                                       |
| glsFeatPopnOL    | rlsFeatPopnOL    | boolean | g(r)IsFeatPopnOL = 1 indicates Feature is a population outlier in g(r)               | Boolean flag indicating if a feature is a Population Outlier or not. Probes with replicate features on a microarray are examined using population statistics.<br><br>A feature is a population outlier if its signal is less than a lower threshold or exceeds an upper threshold determined using a multiplier (1.42) times the interquartile range (i.e., IQR) of the population. |
| glsBGPopnOL      | rlsBGPopnOL      | boolean | g(r)IsBGPopnOL = 1 indicates local background is a population outlier in g(r)        | The same concept as above but for background                                                                                                                                                                                                                                                                                                                                        |
| IsManualFlag     |                  | boolean |                                                                                      | Boolean to flag features for downstream filtering in third party gene expression software.                                                                                                                                                                                                                                                                                          |
| gBGSubSignal     | rBGSubSignal     | float   | g(r)BGSubSignal = g(r)MeanSignal - g(r)BGUsed                                        | Background-subtracted signal. To view the values used to calculate this variable using different background signals and settings of spatial detrend and global background adjust, see <a href="#">Table 33</a> on page 238.                                                                                                                                                         |

**Table 21** Feature results contained in the FULL output text file (FULL FEATURES table)\* (continued)

| Features (Green)    | Features (Red)  | Types   | Options                                                                               | Description                                                                                                                                                                                                                                                                      |
|---------------------|-----------------|---------|---------------------------------------------------------------------------------------|----------------------------------------------------------------------------------------------------------------------------------------------------------------------------------------------------------------------------------------------------------------------------------|
| gBGSubSigError      | rBGSubSigError  | float   |                                                                                       | Propagated standard error as computed on net g(r) background-subtracted signal.<br><br>For one color, the error model is applied to the background-subtracted signal. This will contain the larger of the universal (UEM) error or the propagated error.                         |
| BGSubSigCorrelation |                 | float   |                                                                                       | Ratio of estimated background-subtracted feature signal covariance in RG space to product of background-subtracted feature standard deviation in RG space                                                                                                                        |
| gIsPosAndSignif     | rIsPosAndSignif | Boolean | g(r)isPosAndSignif = 1 indicates Feature is positive and significant above background | Boolean flag, established via a 2-sided t-test, indicates if the mean signal of a feature is greater than the corresponding background (selected by user) and if this difference is significant. To view variables used in the t-test, see <a href="#">Table 33</a> on page 238. |
| gPValFeatEqBG       | rPValFeatEqBG   | float   |                                                                                       | pValue from t-test of significance between g(r)Mean signal and g(r) background (selected by user)                                                                                                                                                                                |
| gNumBGUsed          | rNumBGUsed      | integer |                                                                                       | Number of local background regions or features used to calculate the background used for background subtraction on this feature.                                                                                                                                                 |
| gIsWellAboveBG      | rIsWellAboveBG  | Boolean |                                                                                       | Boolean flag indicating if a feature is WellAbove Background or not, feature passes g(r)IsPosAndSignif and additionally the g(r)BGSubSignal is greater than 2.6*g(r)BG_SD. You can change the multiplier 2.6.                                                                    |



### 3 Text File Parameters and Results

#### FULL Features Table

**Table 21** Feature results contained in the FULL output text file (FULL FEATURES table)\* (continued)

| Features (Green)   | Features (Red) | Types   | Options                                                                                                     | Description                                                                                                                                                                                                                                                                                                 |
|--------------------|----------------|---------|-------------------------------------------------------------------------------------------------------------|-------------------------------------------------------------------------------------------------------------------------------------------------------------------------------------------------------------------------------------------------------------------------------------------------------------|
| gBGUsed            | rBGUsed        | float   | $g(r)BGSubSignal = g(r)MeanSignal - g(r)BGUsed$                                                             | Background used to subtract from the MeanSignal; variable also used in t-test. To view the values used to calculate this variable using different background signals and settings of spatial detrend and global background adjust, see <a href="#">Table 33</a> on page 238.                                |
| gBGSDUsed          | rBGSDUsed      | float   |                                                                                                             | Standard deviation of background used in g(r) channel; variable also used in t-test and surrogate algorithms. To view the values used to calculate this variable using different background signals and settings of spatial detrend and global background adjust, see <a href="#">Table 33</a> on page 238. |
| IsNormalization    |                | boolean | 1 = Feature used;<br>0 = Feature not used                                                                   | A boolean flag which indicates if a feature is used to measure dye bias                                                                                                                                                                                                                                     |
| gDyeNormSignal     | rDyeNormSignal | float   |                                                                                                             | The dye-normalized signal in the indicated channel                                                                                                                                                                                                                                                          |
| gDyeNormError      | rDyeNormError  | float   |                                                                                                             | The standard error associated with the dye-normalized signal                                                                                                                                                                                                                                                |
| DyeNormCorrelation |                | float   |                                                                                                             | Dye-normalized red and green pixel correlation                                                                                                                                                                                                                                                              |
| ErrorModel         |                |         | 0 = Propagated model chosen by you or by software<br>1 = Universal error model chosen by you or by software | Indicates the error model that you chose for Feature Extraction or that the software uses if you have chosen the "Most Conservative" option                                                                                                                                                                 |
| xDev               |                | float   |                                                                                                             | A signal-to-noise parameter used to calculate pValue; calculated differently depending on error model chosen                                                                                                                                                                                                |

**Table 21** Feature results contained in the FULL output text file (FULL FEATURES table)\* (continued)

| Features (Green)             | Features (Red)               | Types   | Options                                                        | Description                                                                                                                                                                                                                                                                   |
|------------------------------|------------------------------|---------|----------------------------------------------------------------|-------------------------------------------------------------------------------------------------------------------------------------------------------------------------------------------------------------------------------------------------------------------------------|
| gSpatialDetrendInFilteredSet | rSpatialDetrendInFilteredSet | boolean | 1 = Feature in filtered set<br>0 = Feature not in filtered set | Set to true for a given feature if it is part of the filtered set used to detrend the background. This feature is considered part of the locally weighted lowest x% of features as defined by the <i>DetrendLowPassPercentage</i> .                                           |
| gSpatialDetrendSurfaceValue  | rSpatialDetrendSurfaceValue  | float   |                                                                | Value of the smoothed surface calculated by the Spatial detrend algorithm                                                                                                                                                                                                     |
| gIsLowEnoughAddDetrend       | rIsLowEnoughAddDetrend       | boolean |                                                                | These points are considered to be in the background for the purposes of spatial detrending and multiplicative detrending. If the Boolean value is true for a given point, it will be used in spatial detrending and not in multiplicative detrending (depends on parameters). |
| SpotExtentX                  |                              | float   |                                                                | Diameter of the spot (X-axis)                                                                                                                                                                                                                                                 |
| SpotExtentY                  |                              | float   |                                                                | Diameter of the spot (Y-axis)                                                                                                                                                                                                                                                 |
| gNetSignal                   | rNetSignal                   | float   |                                                                | MeanSignal minus DarkOffset                                                                                                                                                                                                                                                   |
| gTotalProbeSignal            |                              | float   |                                                                | This signal is the robust average of all the processed green signals for each replicated probe multiplied by the total number of probe replicates, the EffectiveFeature SizeFraction, the Nominal Spot Area and the Weight. For miRNA analyses                                |
| gTotalProbeError             |                              | float   |                                                                | This error is the robust average of all the processed green signal errors for each replicated probe multiplied by the total number of probe replicates, the EffectiveFeature SizeFraction, the Nominal Spot Area and the Weight. For miRNA analyses                           |

### 3 Text File Parameters and Results

#### FULL Features Table

**Table 21** Feature results contained in the FULL output text file (FULL FEATURES table)\* (continued)

| Features (Green)         | Features (Red)           | Types   | Options                                  | Description                                                                                                                                                                                                                                                                                                                                                                                              |
|--------------------------|--------------------------|---------|------------------------------------------|----------------------------------------------------------------------------------------------------------------------------------------------------------------------------------------------------------------------------------------------------------------------------------------------------------------------------------------------------------------------------------------------------------|
| gTotalGeneSignal         |                          | float   |                                          | This signal is the sum of the total probe signals in the green channel per gene. For miRNA analyses.                                                                                                                                                                                                                                                                                                     |
| gTotalGeneError          |                          | float   |                                          | This error is the square root of the sum of the squares of the TotalProbeError. For miRNA analyses.                                                                                                                                                                                                                                                                                                      |
| glsGeneDetected          |                          | boolean |                                          | Lets you know if the gene was detected on the miRNA microarray.                                                                                                                                                                                                                                                                                                                                          |
| gMultDetrendSignal       | rMultDetrendSignal       | float   |                                          | A surface is fitted through the log of the background-subtracted signal to look for multiplicative gradients. A normalized version of that surface interpolated at each point of the microarray is stored in MultDetrendSignal. The surface is normalized by dividing each point by the overall average of the surface. That average is stored in MultDetrendSurfaceAverage as a statistic. 1-color only |
| gProcessed Background    | rProcessed Background    | float   |                                          | Indicates the Background signal that was selected to be used (Mean or Median).                                                                                                                                                                                                                                                                                                                           |
| gProcessedBkng Error     | rProcessedBkng Error     | float   |                                          | Indicates the Background error that was selected to be used (PixSD or NormIQR)                                                                                                                                                                                                                                                                                                                           |
| lsUsedBGAdjust           |                          | boolean | 1 = Feature used<br>0 = Feature not used | A Boolean used to flag features used for computation of global BG offset                                                                                                                                                                                                                                                                                                                                 |
| gInterpolatedNeg CtrlSub | rInterpolatedNeg CtrlSub | float   |                                          | Value at the polynomial fit of the negative controls.                                                                                                                                                                                                                                                                                                                                                    |
| glsInNegCtrlRange        | rlsInNegCtrlRange        | boolean |                                          | Set to true for a given feature if its signal intensity is in the negative control range.                                                                                                                                                                                                                                                                                                                |
| glsUsedInMD              | rlsUsedInMD              | boolean |                                          | Indicates whether this feature was included in the set used to generate the multiplicative detrend surface.                                                                                                                                                                                                                                                                                              |
